# Supplementary material for: Development and Validation of a Food Frequency Questionnaire for Evaluating the Nutritional Status of Patients with Serious Mental Illnesses (DIETQ-SMI) in Bahrain
Source: MDPI journal article supplement (doi:10.3390/brainsci14040312), 2024-03-26
Supplement: s1 [file s1]

## Supplemental Material S2

| <b>Mark HOW OFTEN you consumed the following foods during the <u>two weeks</u></b><br>Caution, answer considering as portion the quantity that is entered in the parenthesis<br>(t =times, g= gram, pcs =pieces, c = cup =240 ml) |                                                          |                  |                 |               |               |            |         |
|-----------------------------------------------------------------------------------------------------------------------------------------------------------------------------------------------------------------------------------|----------------------------------------------------------|------------------|-----------------|---------------|---------------|------------|---------|
| SN                                                                                                                                                                                                                                | Item                                                     | Never/<br>Rarely | 1-3 t/<br>month | 1-2t/<br>week | 3-6t/<br>week | 1t/<br>day | ≥2t/day |
| 1                                                                                                                                                                                                                                 | White "Lebanese/Arabic" bread (1 pc, 30gr)               |                  |                 |               |               |            |         |
| 2                                                                                                                                                                                                                                 | White toasted bread (2 pcs)                              |                  |                 |               |               |            |         |
| 3                                                                                                                                                                                                                                 | Brown "Lebanese/Arabic" bread (1 pc, 30gr)               |                  |                 |               |               |            |         |
| 4                                                                                                                                                                                                                                 | Brown toasted grain bread (2 pcs)                        |                  |                 |               |               |            |         |
| 5                                                                                                                                                                                                                                 | Biscuits (2 pcs), rusks (1 pcs), cookies (2 pcs)         |                  |                 |               |               |            |         |
| 6                                                                                                                                                                                                                                 | Cereals (1 cup), cereals bar (1 pcs)                     |                  |                 |               |               |            |         |
| 7                                                                                                                                                                                                                                 | Beef (steak) (1p~150 grams)                              |                  |                 |               |               |            |         |
| 8                                                                                                                                                                                                                                 | Burgers (1 pc)                                           |                  |                 |               |               |            |         |
| 9                                                                                                                                                                                                                                 | meatballs (4 pcs)                                        |                  |                 |               |               |            |         |
| 10                                                                                                                                                                                                                                | minced meat (1c)                                         |                  |                 |               |               |            |         |
| 11                                                                                                                                                                                                                                | Chicken (all types) (150 gr)                             |                  |                 |               |               |            |         |
| 12                                                                                                                                                                                                                                | Lamb, goat, deer, rabbit, lamb chops (150 grams)         |                  |                 |               |               |            |         |
| 13                                                                                                                                                                                                                                | Fish (approx. 150 g, specify)                            |                  |                 |               |               |            |         |
| 14                                                                                                                                                                                                                                | Seafood (octopus, squid, shrimp) (150 grams)             |                  |                 |               |               |            |         |
| 15                                                                                                                                                                                                                                | Lentils, beans, chickpeas (1 c) (1 dish = 2 cups)        |                  |                 |               |               |            |         |
| 16                                                                                                                                                                                                                                | Fresh soup, (1 portion=250ml)                            |                  |                 |               |               |            |         |
| 17                                                                                                                                                                                                                                | Soup with pasta (e.g. noodles) (1 portion=250ml)         |                  |                 |               |               |            |         |
| 18                                                                                                                                                                                                                                | Rice, (1 cup, 1 medium plate)                            |                  |                 |               |               |            |         |
| 19                                                                                                                                                                                                                                | Boiled potatoes, mashed potatoes (1 medium)              |                  |                 |               |               |            |         |
| 20                                                                                                                                                                                                                                | French fries (1 portion)                                 |                  |                 |               |               |            |         |
| 21                                                                                                                                                                                                                                | Pizza (1 slice)                                          |                  |                 |               |               |            |         |
| 22                                                                                                                                                                                                                                | Fresh Fruits (specify) Apples, bananas, oranges          |                  |                 |               |               |            |         |
| 23                                                                                                                                                                                                                                | Fresh Fruits (specify) Strawberries, berries, pineapples |                  |                 |               |               |            |         |
| 24                                                                                                                                                                                                                                | Fresh Fruits (specify) Watermelons, melons               |                  |                 |               |               |            |         |
| 25                                                                                                                                                                                                                                | Fresh Vegetables (specify) Potatoes, tomatoes, onions    |                  |                 |               |               |            |         |
| 26                                                                                                                                                                                                                                | Fresh Vegetables (specify) Carrots, cucumbers            |                  |                 |               |               |            |         |
| 27                                                                                                                                                                                                                                | Fresh Vegetables (specify) Sweet Chili, Salads           |                  |                 |               |               |            |         |
| 28                                                                                                                                                                                                                                | Dried fruits (¼ cup)                                     |                  |                 |               |               |            |         |
| 29                                                                                                                                                                                                                                | Dried nuts, nuts (¼ cup)                                 |                  |                 |               |               |            |         |
| 30                                                                                                                                                                                                                                | Yoghurt complete or light (1 tub)                        |                  |                 |               |               |            |         |
| 31                                                                                                                                                                                                                                | Cream cheese "Glasses" (25 gr)                           |                  |                 |               |               |            |         |
| 32                                                                                                                                                                                                                                | Feta, white cheese, hard cheese (25 gr)                  |                  |                 |               |               |            |         |
| 33                                                                                                                                                                                                                                | Egg (boiled, fried, omelet) (1 pcs)                      |                  |                 |               |               |            |         |
| 34                                                                                                                                                                                                                                | Pies (ex. Cheese pie, spinach pie) (1 portion)           |                  |                 |               |               |            |         |
| 35                                                                                                                                                                                                                                | Ice cream, milk shake, pudding, rice pudding (1 pcs)     |                  |                 |               |               |            |         |
| 36                                                                                                                                                                                                                                | Honey, jam (1 teaspoon)                                  |                  |                 |               |               |            |         |

|    |                                                                                                                                                         |  |  |  |  |  |  |
|----|---------------------------------------------------------------------------------------------------------------------------------------------------------|--|--|--|--|--|--|
| 37 | Olives (10 small /5 large)                                                                                                                              |  |  |  |  |  |  |
| 38 | Chocolate (all types) (1 medium = 60 gr)                                                                                                                |  |  |  |  |  |  |
| 39 | Chips packs, popcorn (1 bag =70 gr)                                                                                                                     |  |  |  |  |  |  |
| 40 | Fruit juice (1 glass or 1 small juice pack)                                                                                                             |  |  |  |  |  |  |
| 41 | Soft drinks, (1 can)                                                                                                                                    |  |  |  |  |  |  |
| 42 | Milk, milk shake (1 glass)                                                                                                                              |  |  |  |  |  |  |
| 43 | Coffee in a cup (e.g. Americano, Espresso)                                                                                                              |  |  |  |  |  |  |
| 44 | Arabic Coffee                                                                                                                                           |  |  |  |  |  |  |
| 45 | Tea, other herbal teas (e.g. chamomile, peppermint) (1 cup)                                                                                             |  |  |  |  |  |  |
| 46 | Isotonic/energy drinks (1 glass)                                                                                                                        |  |  |  |  |  |  |
| 47 | Alcoholic drinks (wine, beer, whisky, vodka, (1 unit)                                                                                                   |  |  |  |  |  |  |
| 48 | Honey                                                                                                                                                   |  |  |  |  |  |  |
| 49 | Herbs and Spices (basil, oregano, cinnamon, cumin, and paprika) (1 tea spoon)                                                                           |  |  |  |  |  |  |
| 50 | Oils and Fats: Oils such as olive oil, vegetable oil, and coconut oil, as well as fats like butter, are used for cooking, frying, and baking (1 spoon). |  |  |  |  |  |  |
